# Supplementary material
Source: Elsevier journal article supplement (https://www.sciencedirect.com/science/article/pii/S0211139X22000658)
Supplement: mmc1 [file S0211139X22000658:mmc1.doc]

**El IF-VIG es un índice de fragilidad basado en el modelo de acumulación de déficits, que permite medir la fragilidad como una variable continua. Comparte la multidimensionalidad de la valoración integral geriátrica. Consta de 25 variables que pertenecen a diferentes dominios: funcional, nutricional, emocional, social, síndromes geriátricos, síntomas graves, enfermedades. Se puntúa con 1 punto en cada ítem y finalmente el total se divide por 25. Los resultados se clasifican en pacientes robustos IF-VIG < 0.35, pacientes pre-frágiles 0.35-0.5, pacientes frágiles >0.5.**
